# Supplementary material for: The cryo-EM structure of hibernating 100S ribosome dimer from pathogenic Staphylococcus aureus
Source: PubMed Central journal article supplement (PMC5620080; doi:10.1038/s41467-017-00753-8), 2017-09-28
Supplement: 41467_2017_753_MOESM1_ESM.pdf [file 41467_2017_753_MOESM1_ESM.pdf]

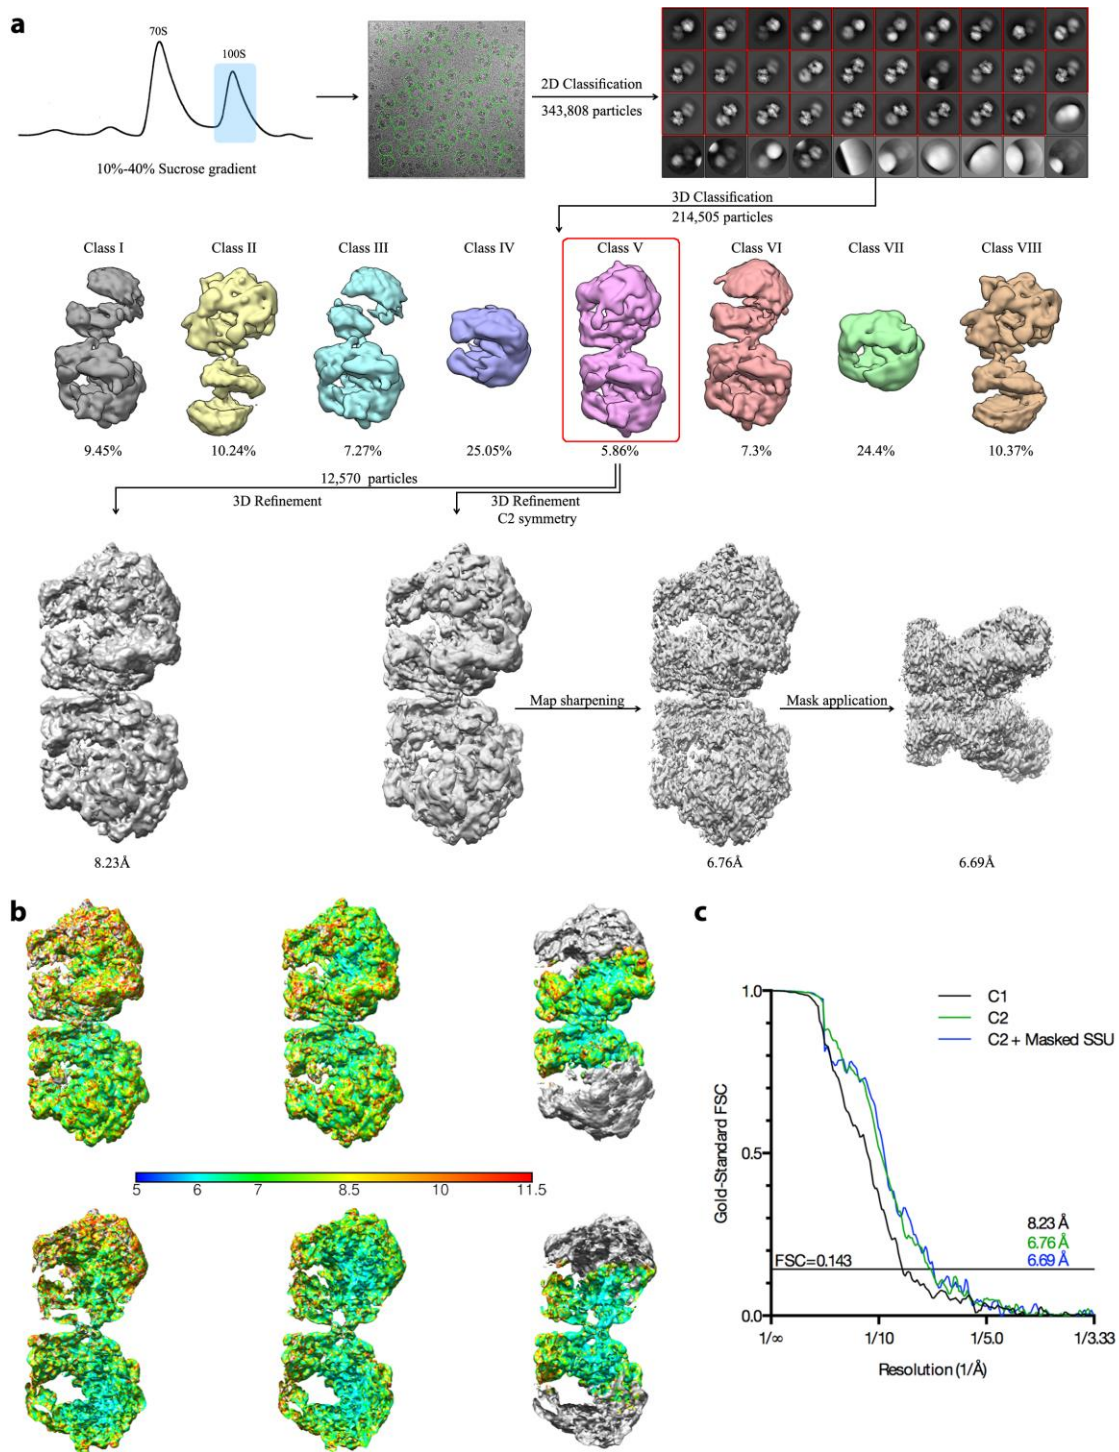

**Supplementary Figure 2. Flow-chart for the cryo-EM analysis of SA100S. A.** Cryo-EM image processing of the *S. aureus* 100S dimer. **B.** The local resolution map of the (from left to right) 100S, 100S processed with C2 symmetry, masked dimerization domain. **C.** Fourier shell correlation curves. Resolution of the calculated maps reported according to the gold standard FSC=0.143 criterion as implemented in RELION.

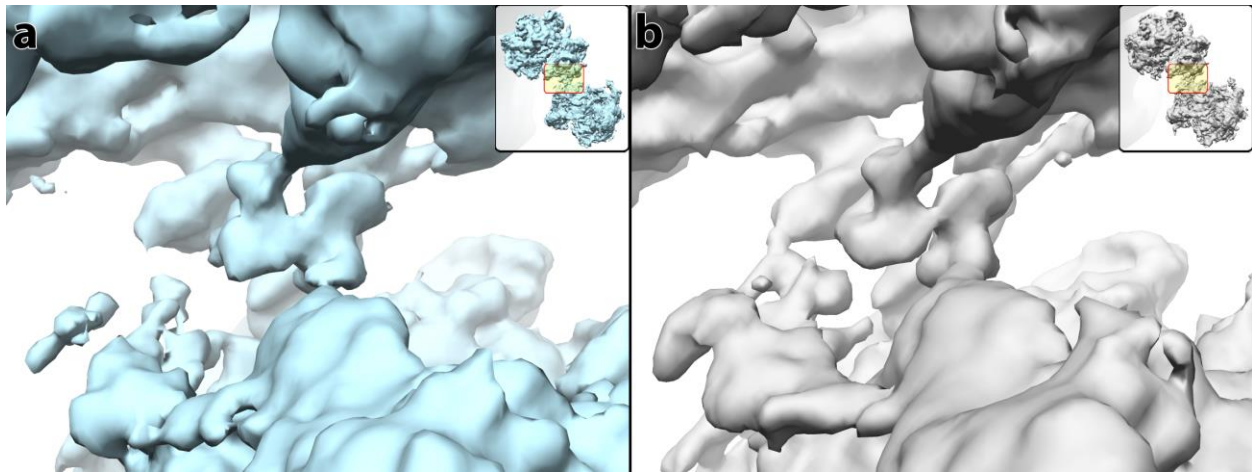

**Supplementary Figure 3. C2 symmetry application improves the interface region within the SA100S maps.** The interface region between the two 70S ribosome composing the 100S dimer in **A.** the SA100S dimer and **B.** the SA100S dimer refined with C2 symmetry applied. Both maps are displayed at the same  $\sigma$ . View of the whole 100S and the interface region within the 100S structure of both A and B. is shown in the upper right inset.

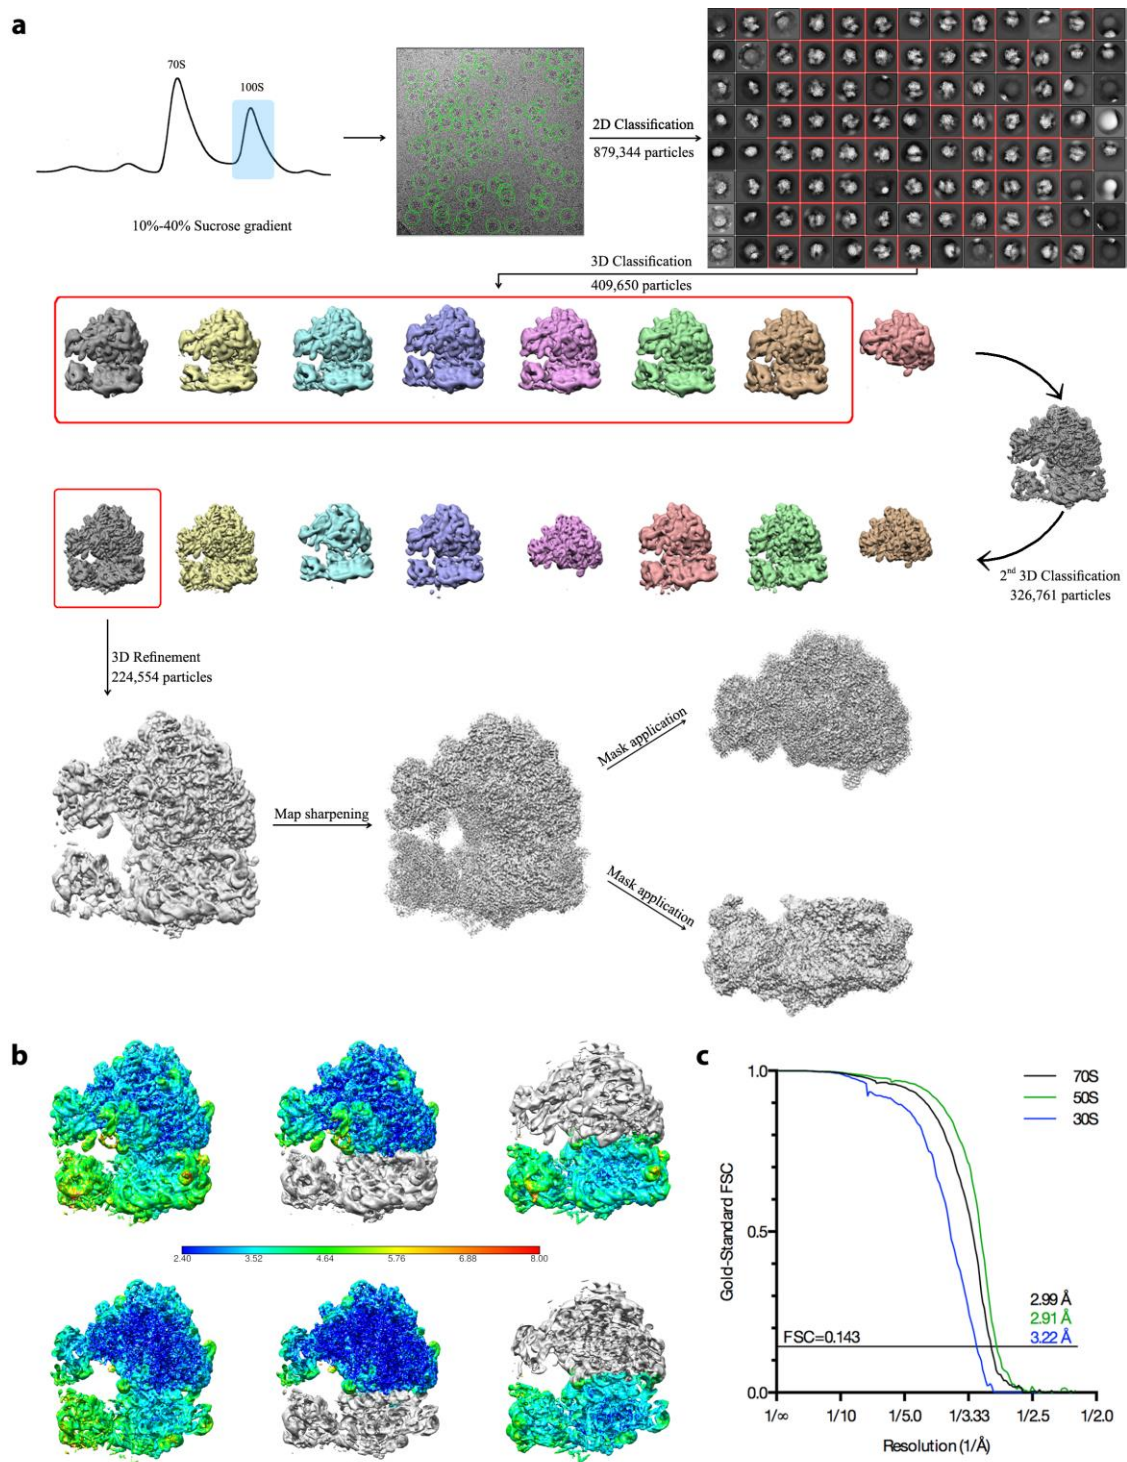

**Supplementary Figure 4. Flow-chart for the cryo-EM analysis of SA70S composing the SA100S dimer. A.** Cryo-EM image processing of the *S. aureus* 100S as monomers. **B.** The local resolution map of the (from left to right) 70S, 50S, 30S **C.** Fourier shell correlation curves. Resolution of the calculated maps reported according to the gold standard FSC=0.143 criterion as implemented in RELION.

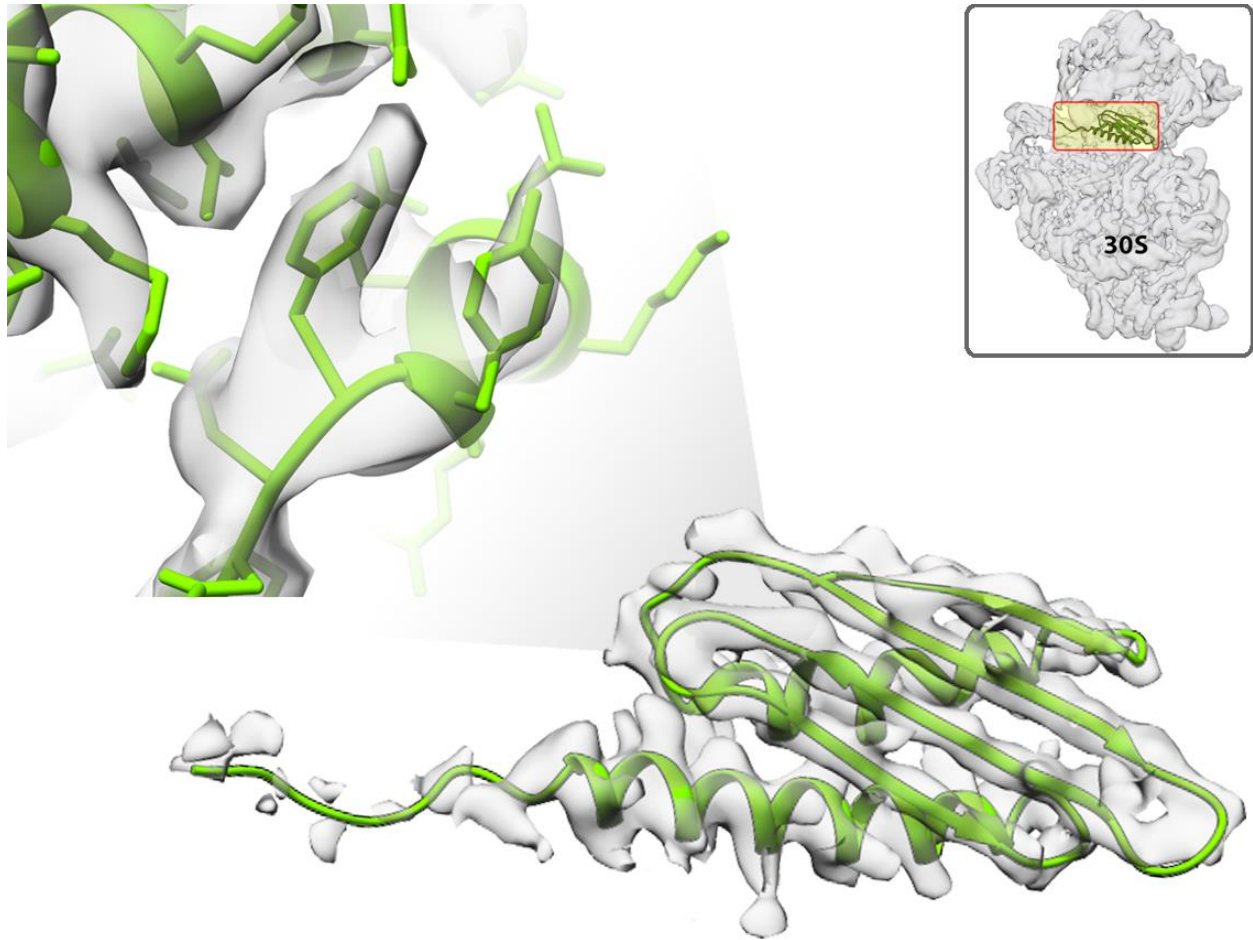

**Supplementary Figure 5. N-terminal domain of HPF<sub>SA</sub>.** Bottom right, the whole N-HPF<sub>SA</sub>, colored in chartreuse fitted into the 30S masked cryo-EM density map at 3.6Å. Top left, a close-up view into the protein. The N-HPF<sub>SA</sub> location on a single 70S monomer is shown in the upper right inset.

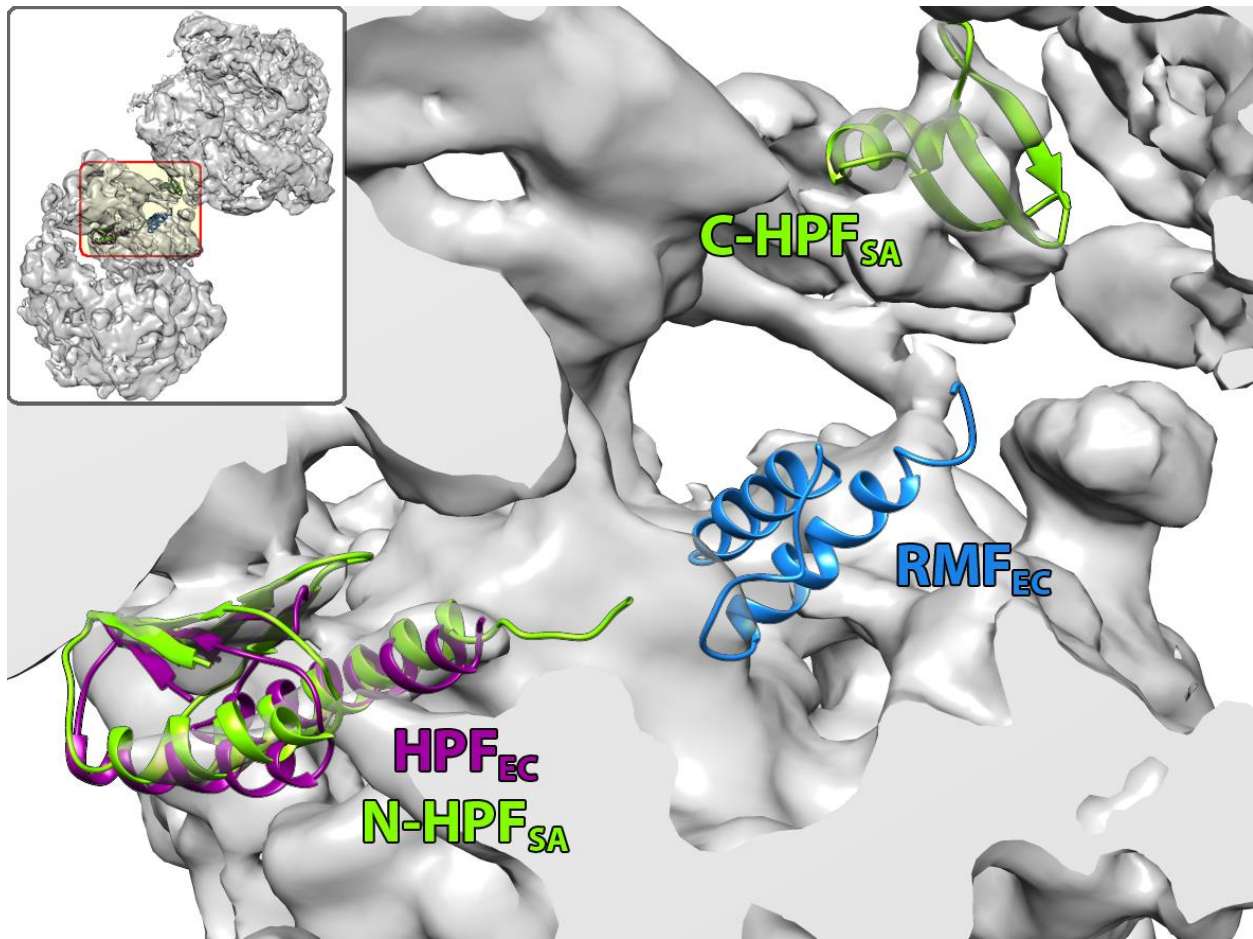

**Supplementary Figure 6. Close-up view into HPF<sub>SA</sub> binding pocket.** HPF<sub>SA</sub>, colored in chartreuse is fitted into the 6.7Å 100S cryo-EM map. Superposition of the structures of *Tth* bound to HPF<sub>EC</sub> (magenta, PDB ID 4V8H) and RMF<sub>EC</sub> (blue, PDB ID 4V8G) on the structure of SA100S reveals no additional density adjacent to the superimposed RMF<sub>EC</sub>. The interface region within the 100S structure is shown in the upper left inset.

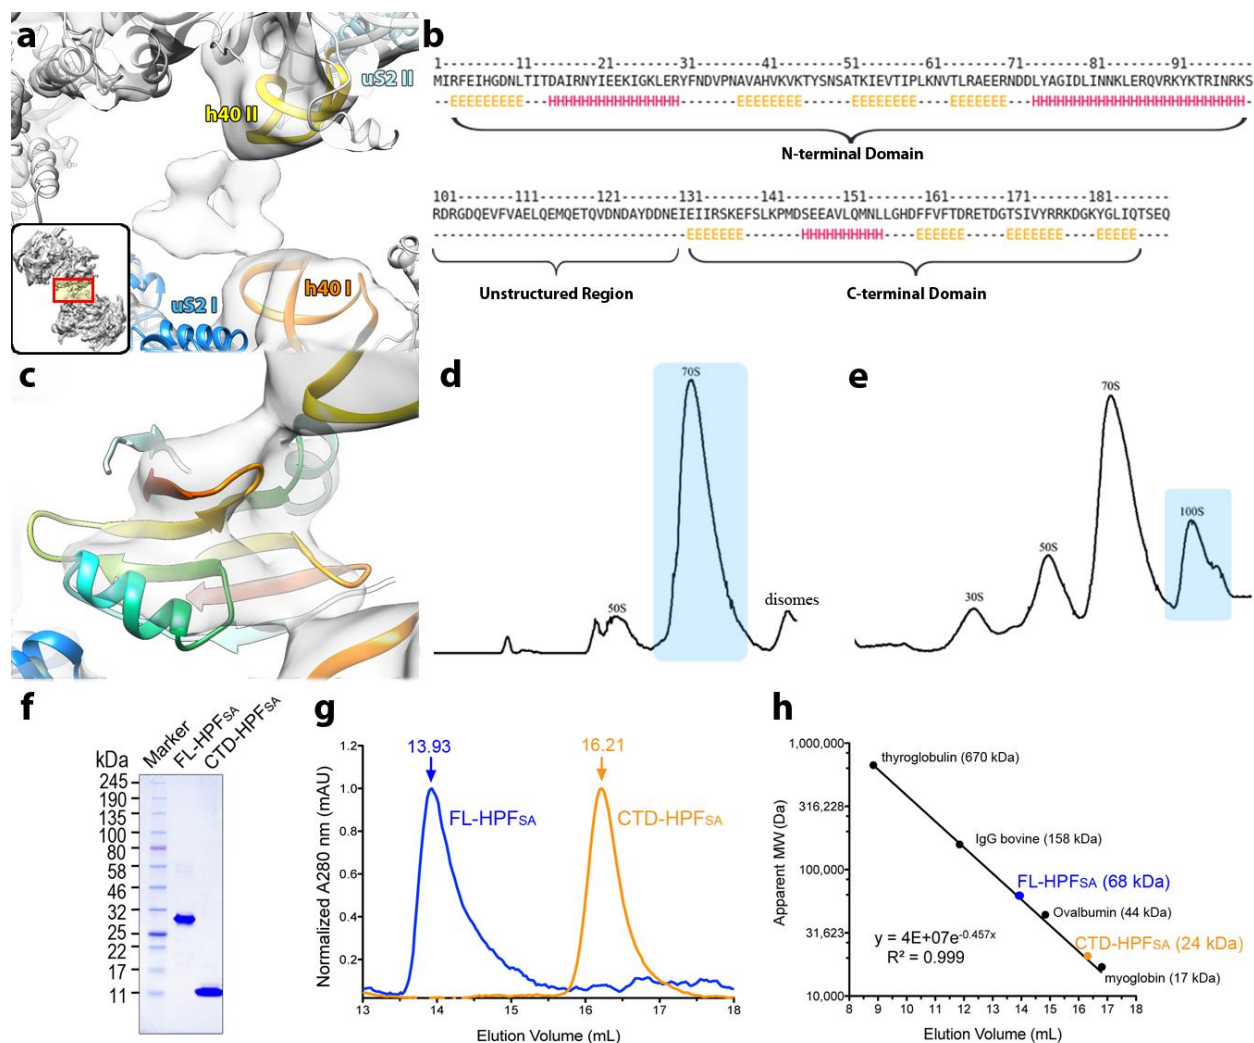

**Supplementary Figure 7. C-terminal domain of HPF<sub>SA</sub> analysis. A.** Close-up view of the interface area of the two 30S subunits and the unidentified density of the 100S cryo-EM density map. The interface region within the 100S structure is shown in the lower inset. **B.** Secondary structure prediction of HPF<sub>SA</sub> calculated by Jpred [1] suggests that this protein has two domains linked by a flexible loop. **C.** tertiary structure prediction of both C-HPF<sub>SA</sub> calculated using SWISS-MODEL [2-4] and fitted into the unidentified density. **D, E.** Ribosome profile of C-HPF<sub>SA</sub> truncated SA strain (**D**) and N-HPF<sub>SA</sub> truncated SA strain (**E**). **F.** Coomassie blue-stained SDS-PAGE of the purified recombinant FL-HPF<sub>SA</sub> and CTD-HPF<sub>SA</sub>. The proteins were resolved on a 4-20% TGX (BioRad) gel. Each lane corresponds to ca. 10 μg of proteins. **G.** Elution profiles of the FL-HPF<sub>SA</sub> (blue) and CTD-HPF<sub>SA</sub> (orange). **H.** Standard curve for the molecular mass determination demonstrates the apparent molecular weight of FL-HPF<sub>SA</sub> (68.8 kDa, eluted in 13.93 ml) and CTD-HPF<sub>SA</sub> (24.2 kDa, eluted in 16.21 ml). This roughly corresponds to the dimer of the FL-HPF<sub>SA</sub> (~30 kDa) and CTD-HPF<sub>SA</sub> (~11 kDa) monomer, respectively, as seen in the SDS-PAGE gel.

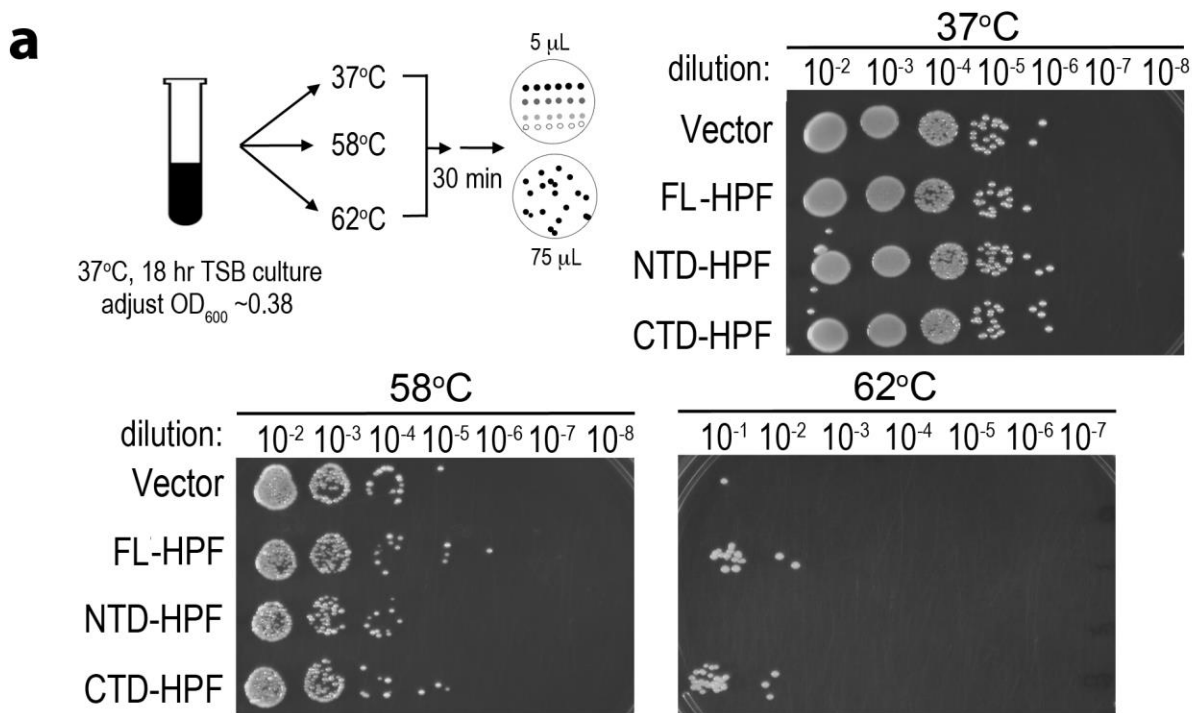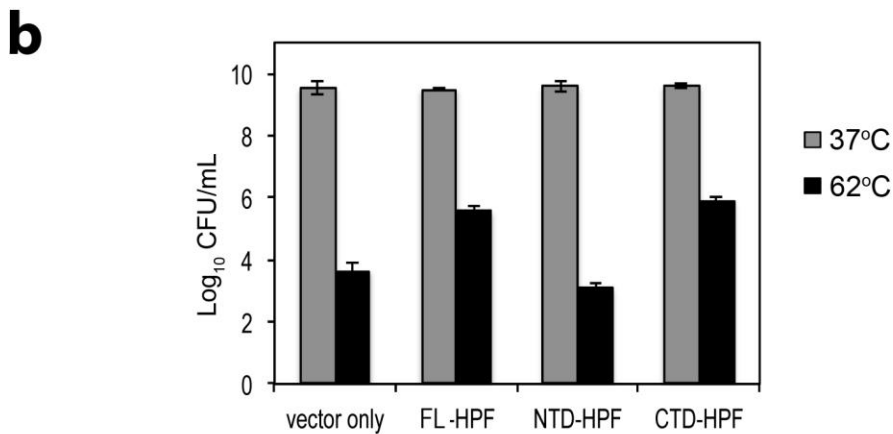

**Supplementary Figure 8. Ribosomal dimerization is required for cell survival upon heat stress. A.** Spotting assay. **B.** Determination of colony forming units (CFUs). *S. aureus* hpf knockout strains harboring the empty vector, full-length (FL) HPF, NTD-HPF and CTD-HPF were exposed to severe temperature upshift from 37°C to 58°C and 62°C for 30 min. Serially diluted cells were spotted (5 µL/spot) or spread (75 µL/plate) on agar plates and grown overnight at 37°C to determine cell viability. With the exception of 58°C (two replicates), spotting assay data are representative of three independent experiments. Thermal killing data in (B) are means and standard deviations (n=3). TSB, tryptic soy broth.



| <b>Data collection</b>                                                                                                                                                                                                                                                                                                                                                                                         |                   |                   |
|----------------------------------------------------------------------------------------------------------------------------------------------------------------------------------------------------------------------------------------------------------------------------------------------------------------------------------------------------------------------------------------------------------------|-------------------|-------------------|
| Microscope                                                                                                                                                                                                                                                                                                                                                                                                     | Titan Krios       |                   |
| Camera                                                                                                                                                                                                                                                                                                                                                                                                         | CMOS (Falcon II)  |                   |
| Voltage (kV)                                                                                                                                                                                                                                                                                                                                                                                                   | 300               |                   |
| Magnification                                                                                                                                                                                                                                                                                                                                                                                                  | 75K               |                   |
| Pixel size ( $\text{\AA}\cdot\text{px}^{-1}$ )                                                                                                                                                                                                                                                                                                                                                                 | 1.07              |                   |
|                                                                                                                                                                                                                                                                                                                                                                                                                | <b>70S</b>        | <b>100S</b>       |
| Defocus range ( $\mu\text{m}$ )                                                                                                                                                                                                                                                                                                                                                                                | 0.4-3.6           | 0.4-4.4           |
| Total dose ( $\text{e}/\text{\AA}^2$ )                                                                                                                                                                                                                                                                                                                                                                         | 25                | 25                |
| Dose per frame                                                                                                                                                                                                                                                                                                                                                                                                 | ~2.3              | ~2.3              |
| Micrographs collected                                                                                                                                                                                                                                                                                                                                                                                          | 5684              | 12,504            |
| <b>Refinement</b>                                                                                                                                                                                                                                                                                                                                                                                              |                   |                   |
| Number of particles (autopicked)                                                                                                                                                                                                                                                                                                                                                                               | 879,344           | 343,808           |
| Number of particles (used for 3D reconstruction)                                                                                                                                                                                                                                                                                                                                                               | 224,554           | 12,570            |
| Resolution ( $\text{\AA}$ ; at $\text{FSC}^{\text{a}} = 0.143$ )                                                                                                                                                                                                                                                                                                                                               | 2.99              | 6.7               |
| $\text{CC}^{\text{a}}$ (model to map fit)                                                                                                                                                                                                                                                                                                                                                                      | 0.69 <sup>b</sup> | 0.88 <sup>c</sup> |
| <b>RMS<sup>a</sup> deviation</b>                                                                                                                                                                                                                                                                                                                                                                               |                   |                   |
| Bonds ( $^{\circ}$ )                                                                                                                                                                                                                                                                                                                                                                                           | 0.006             | 0.006             |
| Angles ( $^{\circ}$ )                                                                                                                                                                                                                                                                                                                                                                                          | 0.855             | 0.856             |
| Chirality ( $^{\circ}$ )                                                                                                                                                                                                                                                                                                                                                                                       | 0.046             | 0.046             |
| Planarity ( $^{\circ}$ )                                                                                                                                                                                                                                                                                                                                                                                       | 0.006             | 0.006             |
| <b>Validation<sup>d</sup></b>                                                                                                                                                                                                                                                                                                                                                                                  |                   |                   |
| Clashscore <sup>e</sup>                                                                                                                                                                                                                                                                                                                                                                                        | 7.6               | 7.81              |
| Proteins                                                                                                                                                                                                                                                                                                                                                                                                       |                   |                   |
| MolProbity score                                                                                                                                                                                                                                                                                                                                                                                               | 1.91              | 1.92              |
| Rotamers outliers (%)                                                                                                                                                                                                                                                                                                                                                                                          | 0.81              | 0.81              |
| Ramachandran favored (%)                                                                                                                                                                                                                                                                                                                                                                                       | 91.72             | 91.73             |
| Ramachandran allowed (%)                                                                                                                                                                                                                                                                                                                                                                                       | 8.26              | 8.25              |
| Ramachandran outliers (%)                                                                                                                                                                                                                                                                                                                                                                                      | 0.02              | 0.02              |
| RNA                                                                                                                                                                                                                                                                                                                                                                                                            |                   |                   |
| Correct sugar pucker (%)                                                                                                                                                                                                                                                                                                                                                                                       | 99.14             | 99.15             |
| Correct backbone conformation                                                                                                                                                                                                                                                                                                                                                                                  | 72.12             | 72.1              |
| <sup>a</sup> FSC, Fourier shell correlation; CC, correlation coefficient; RMS, root-mean square.<br><sup>b</sup> Only across atoms in the model; compiled using Phenix[5].<br><sup>c</sup> Across whole map volume; compiled using Phenix[5].<br><sup>d</sup> Compiled using MolProbity[6].<br><sup>e</sup> Clashscore is the number of serious steric overlaps ( $>0.4 \text{ \AA}^{\circ}$ ) per 1000 atoms. |                   |                   |

**Supplementary Table 1.** Data collection, refinement and validation statistics

## Supplementary References

1. Drozdetskiy, A., et al., *JPred4: a protein secondary structure prediction server*. Nucleic Acids Research, 2015. **43**(W1): p. W389-W394.
2. Arnold, K., et al., *The SWISS-MODEL workspace: a web-based environment for protein structure homology modelling*. Bioinformatics, 2006. **22**(2): p. 195-201.
3. Biasini, M., et al., *SWISS-MODEL: modelling protein tertiary and quaternary structure using evolutionary information*. Nucleic Acids Research, 2014. **42**(W1): p. W252-W258.
4. Bordoli, L., et al., *Protein structure homology modeling using SWISS-MODEL workspace*. Nat. Protocols, 2008. **4**(1): p. 1-13.
5. Afonine, P., et al., *New tool: phenix.real\_space\_refine*. Computational Crystallography Newsletter, 2013. **4**: p. 43-44.
6. Chen, V.B., et al., *MolProbity: all-atom structure validation for macromolecular crystallography*. Acta Crystallographica Section D: Biological Crystallography, 2010. **66**(1): p. 12-21.
