# Supplementary material for: The cryo-EM structure of hibernating 100S ribosome dimer from pathogenic Staphylococcus aureus
Source: PubMed Central journal article supplement (PMC5620080; doi:10.1038/s41467-017-00753-8), 2017-09-28
Supplement: 41467_2017_753_MOESM3_ESM.pdf [file 41467_2017_753_MOESM3_ESM.pdf]

## Description of Additional Supplementary Files

File Name: Supplementary Movie 1

Description: **Structural differences of HPF<sub>SA</sub> bound/unbound 30S subunits.** This movie demonstrates the conformational change of the head domain of the *S. aureus* 30S subunit induced by HPF<sub>SA</sub> binding by morphing between the bound and unbound state. HPF<sub>SA</sub> is colored in chartreuse and protein uS2 is colored in orange.
